# Supplementary material for: A choline-releasing glycerophosphodiesterase essential for phosphatidylcholine biosynthesis and blood stage development in the malaria parasite
Source: eLife journal article supplement (doi:10.7554/elife.82207), 2022-12-28

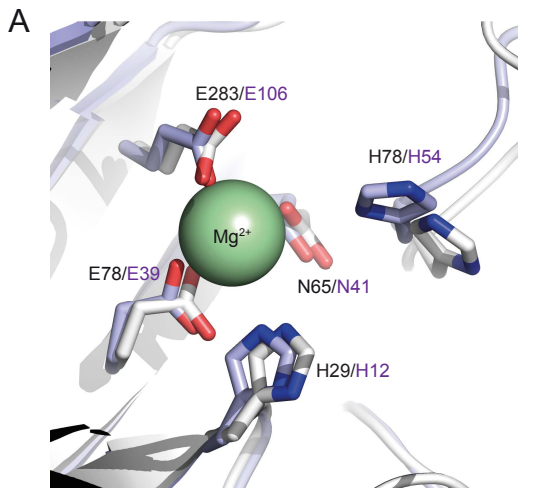

PfGDPD AlphaFold Model (AF-Q8IM31)  
 GDPD (*T. kodakarensis* KOD1) crystal structure (4OEC)  
 Superimposed rmsd = 1.63Å

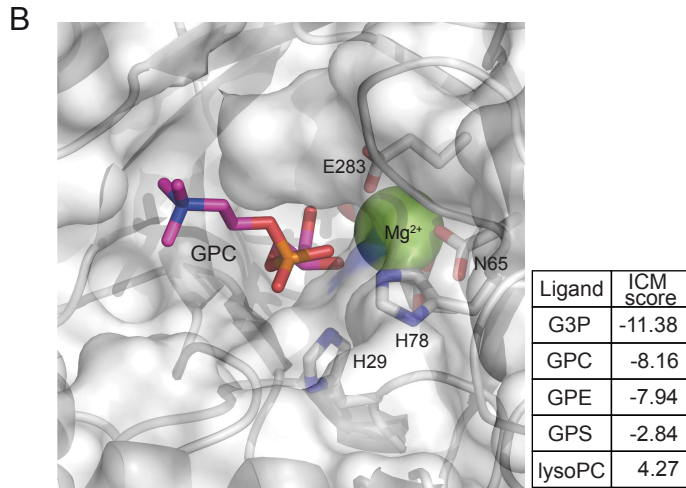

**C**

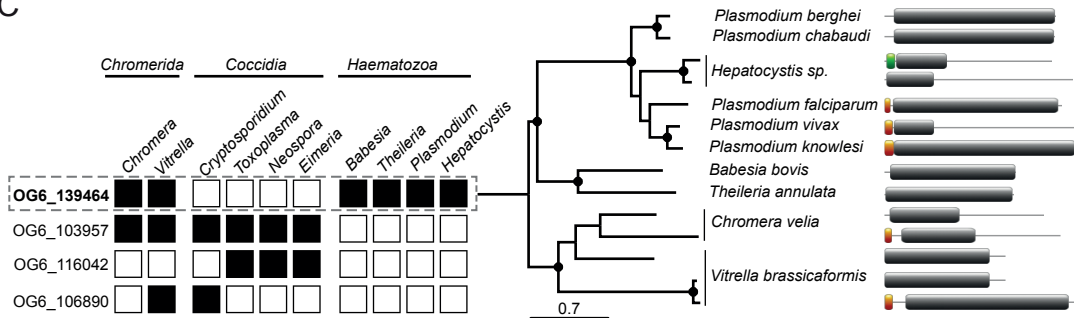

Supplement: supp [file elife-82207-supp-v1.zip]
