# Supplementary material for: A choline-releasing glycerophosphodiesterase essential for phosphatidylcholine biosynthesis and blood stage development in the malaria parasite
Source: eLife journal article supplement (doi:10.7554/elife.82207), 2022-12-28
Supplement: supp [file elife-82207-supp-v1.zip]

## 24h after removing Cho

|                                                                                   | Sample Name | Count |
|-----------------------------------------------------------------------------------|-------------|-------|
|  | G1_22h_Cho  | 427   |
|  | B4_22h_Cho  | 619   |
|  | B4_22h      | 548   |
|  | G1_22h      | 461   |

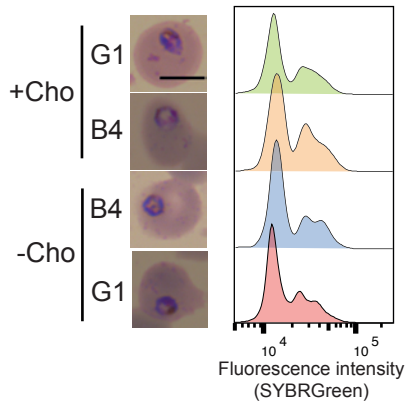

## 44h after removing Cho

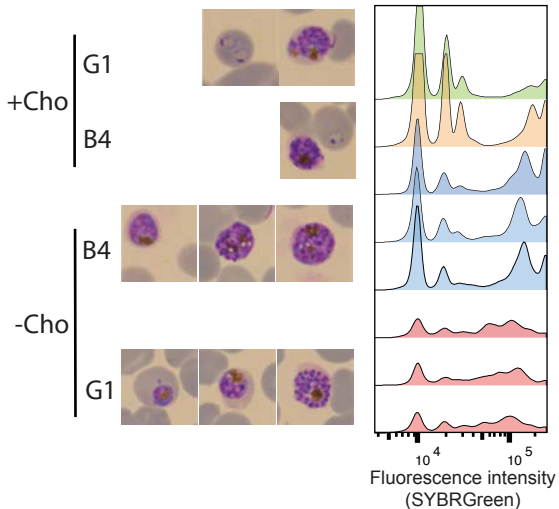

|                                                                                     | Sample Name | Count |
|-------------------------------------------------------------------------------------|-------------|-------|
|  | G1+cho      | 1267  |
|  | B4+cho      | 1973  |
|  | BL1         | 1071  |
|  | BL2         | 1084  |
|  | BL3         | 1135  |
|  | GL1         | 569   |
|  | GL2         | 557   |
|  | GL3         | 594   |
