# Supplementary material for: A choline-releasing glycerophosphodiesterase essential for phosphatidylcholine biosynthesis and blood stage development in the malaria parasite
Source: eLife journal article supplement (doi:10.7554/elife.82207), 2022-12-28

$\begin{matrix} 1 \\ \searrow \\ 2' \end{matrix}$ 
 $\begin{matrix} 1 \\ \searrow \\ 2 \end{matrix}$ 
 $\begin{matrix} 3 \\ \searrow \\ 4 \end{matrix}$

wt    B4    B8    wt    B4    B8    wt    B4    B8

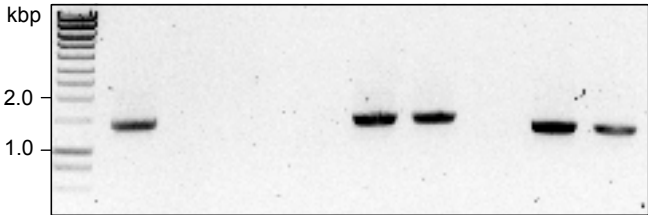

Supplement: supp [file elife-82207-supp-v1.zip]
