# Supplementary figures and images for: A choline-releasing glycerophosphodiesterase essential for phosphatidylcholine biosynthesis and blood stage development in the malaria parasite
Source: eLife journal article supplement (doi:10.7554/elife.82207), 2022-12-28

Figure S1B – Source data

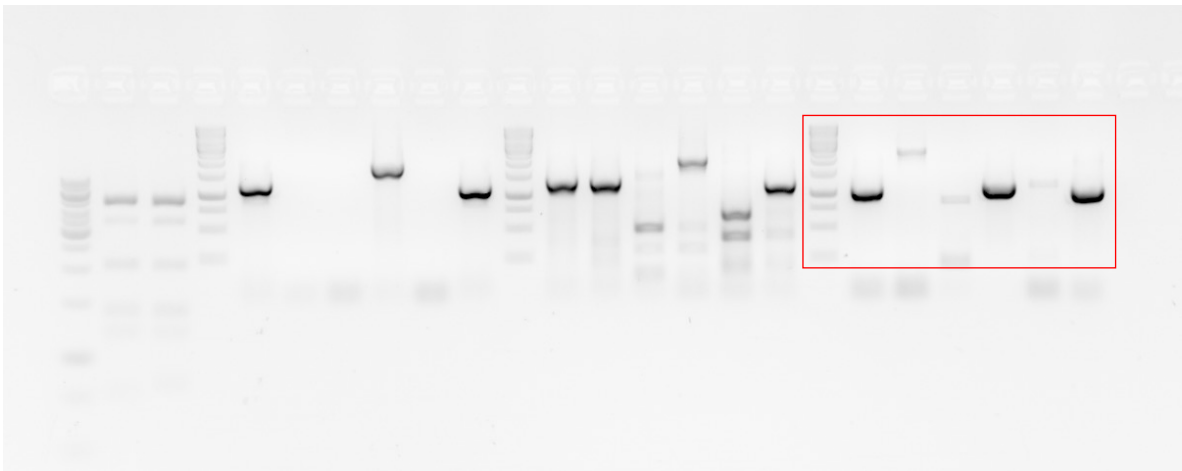

Supplement: supp [file elife-82207-supp-v1.zip]

A

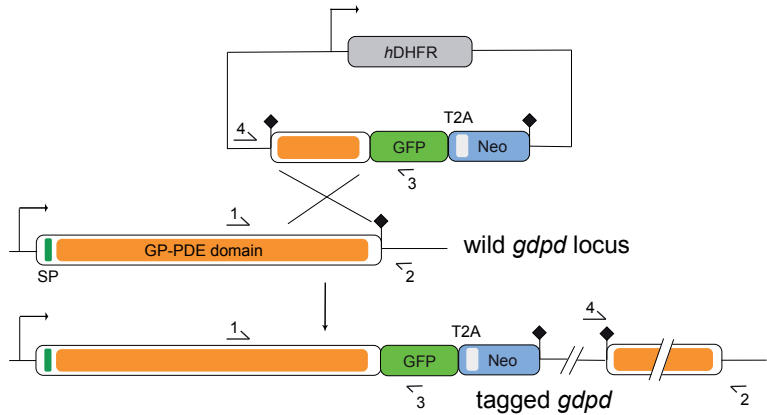

B

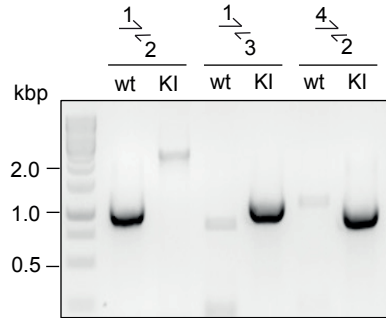

Supplement: supp [file elife-82207-supp-v1.zip]

A

Coomassie blue

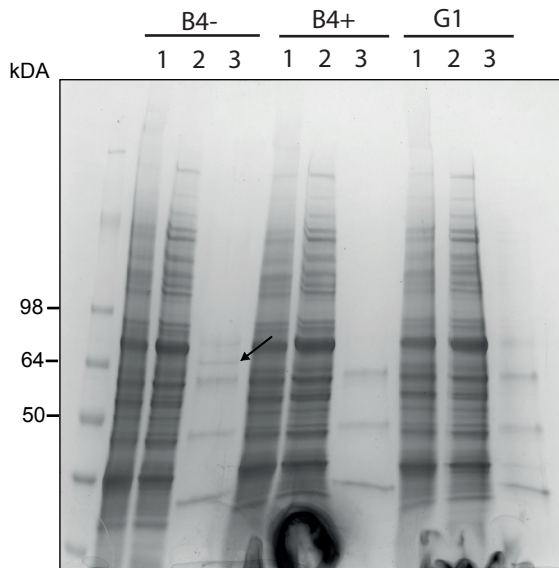

B

anti-HA WB

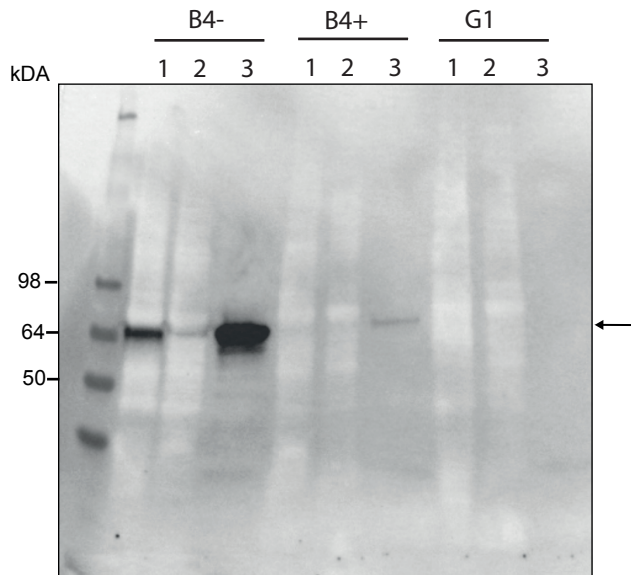

1. saponin lysate
2. supernatant
3. bound fraction

Supplement: supp [file elife-82207-supp-v1.zip]

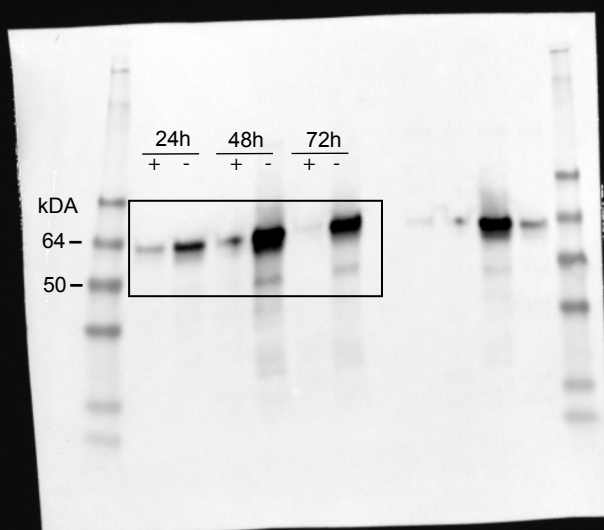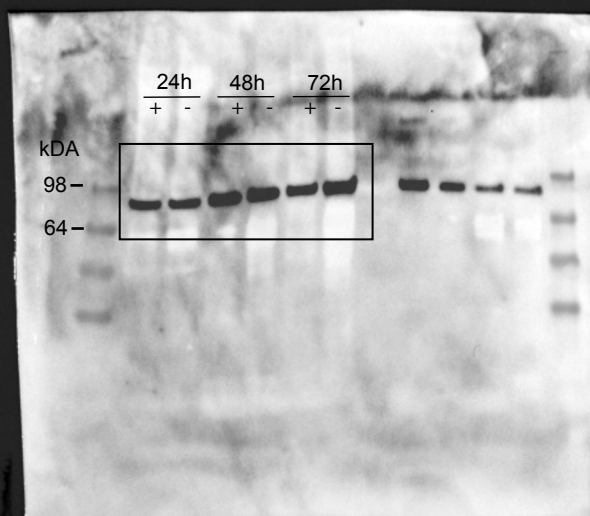

Supplement: supp [file elife-82207-supp-v1.zip]

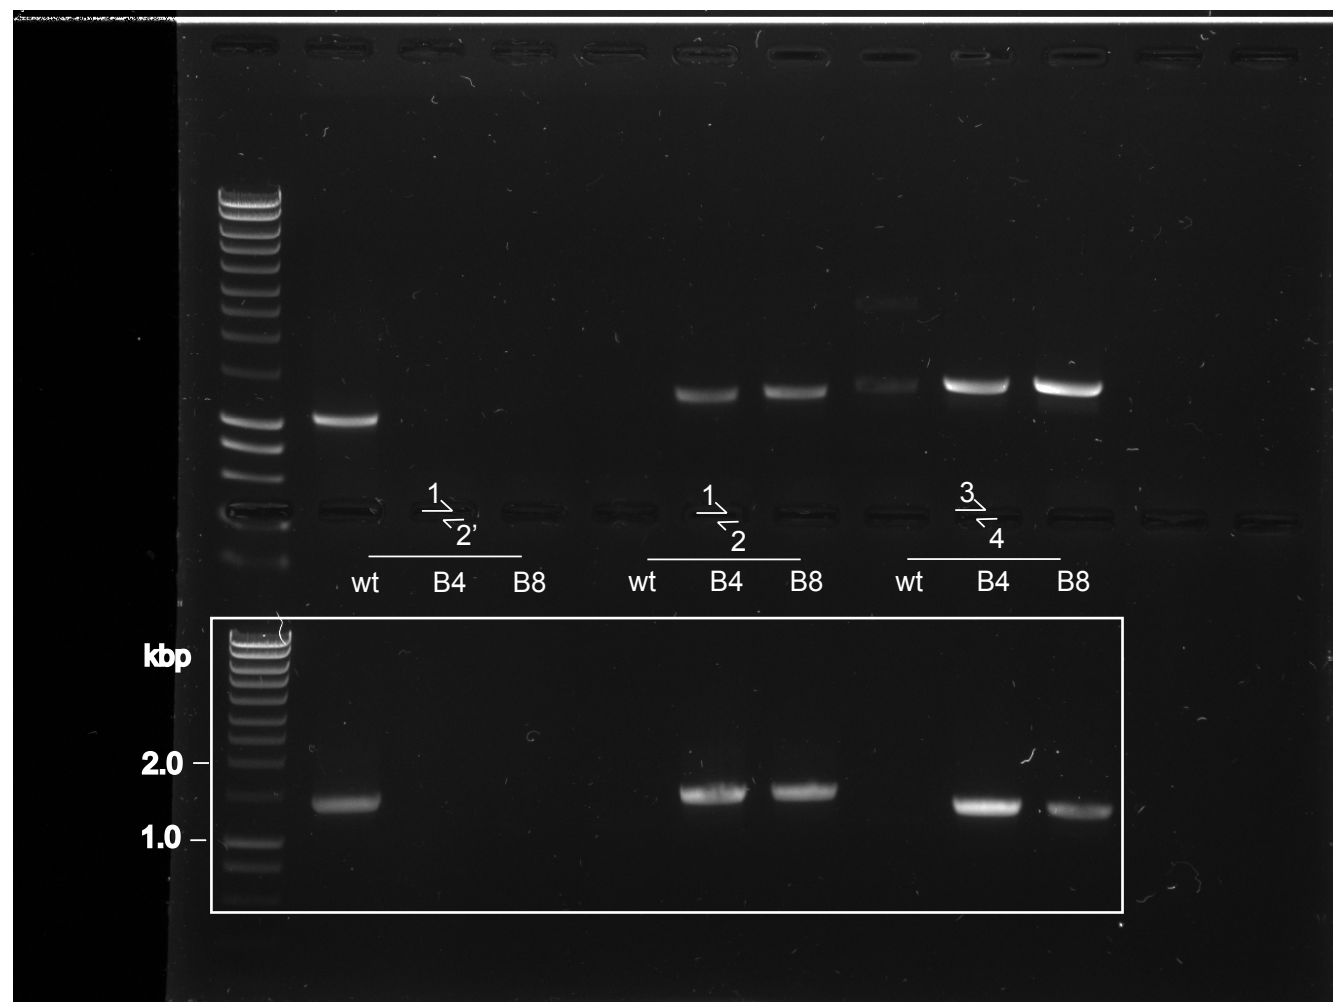

Supplement: supp [file elife-82207-supp-v1.zip]

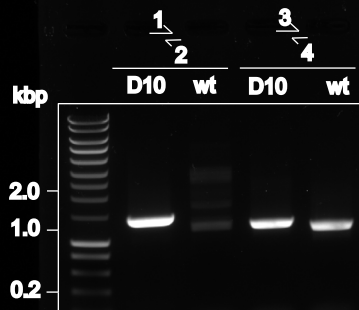

Supplement: supp [file elife-82207-supp-v1.zip]

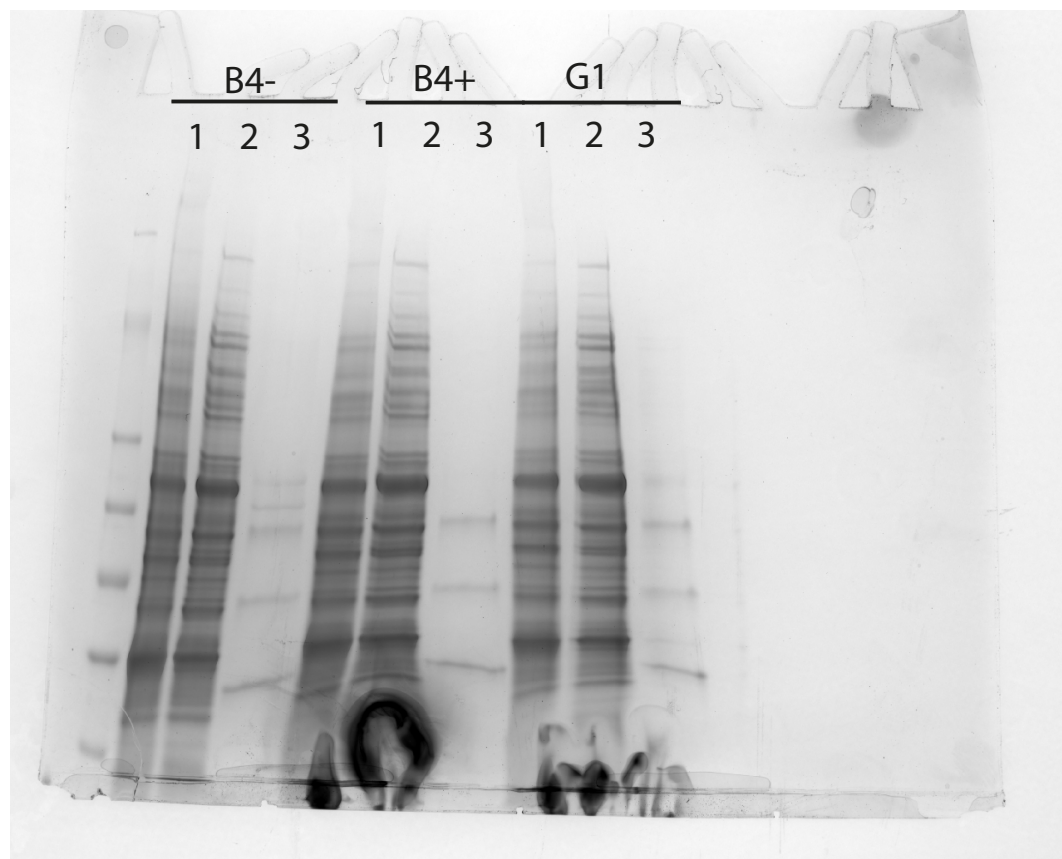

1. saponin lysate
2. supernatant
3. bound fraction

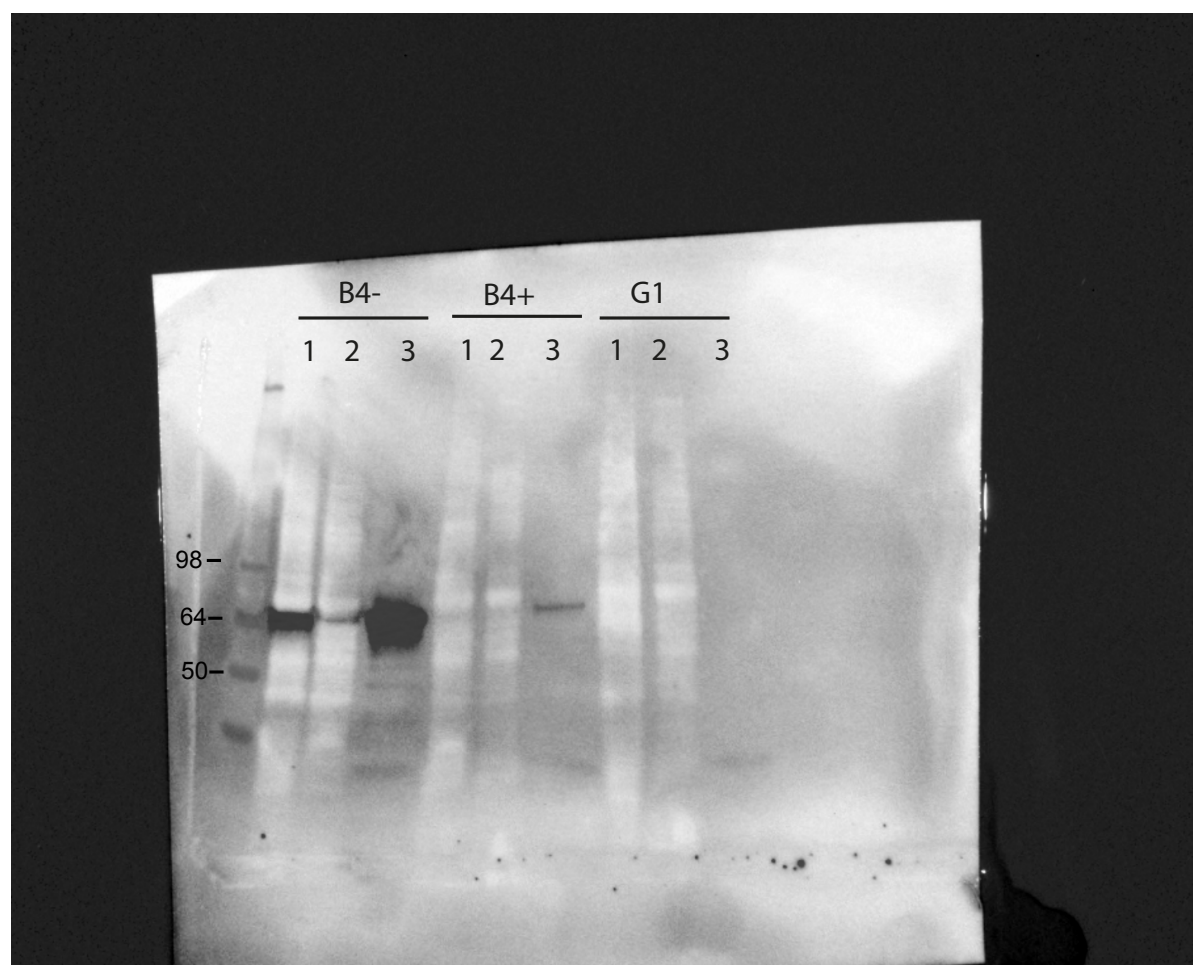

Supplement: supp [file elife-82207-supp-v1.zip]

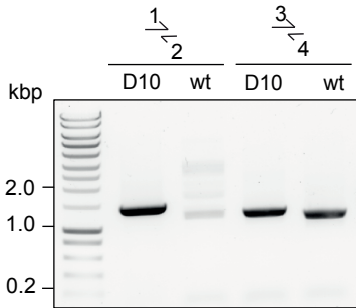

Supplement: supp [file elife-82207-supp-v1.zip]

B4

B8

+

-

+

-

kbp

2.0 -

1.0 -

0.2 -

- Non-excised  
(1,719 bp)

- Excised  
(126 bp)

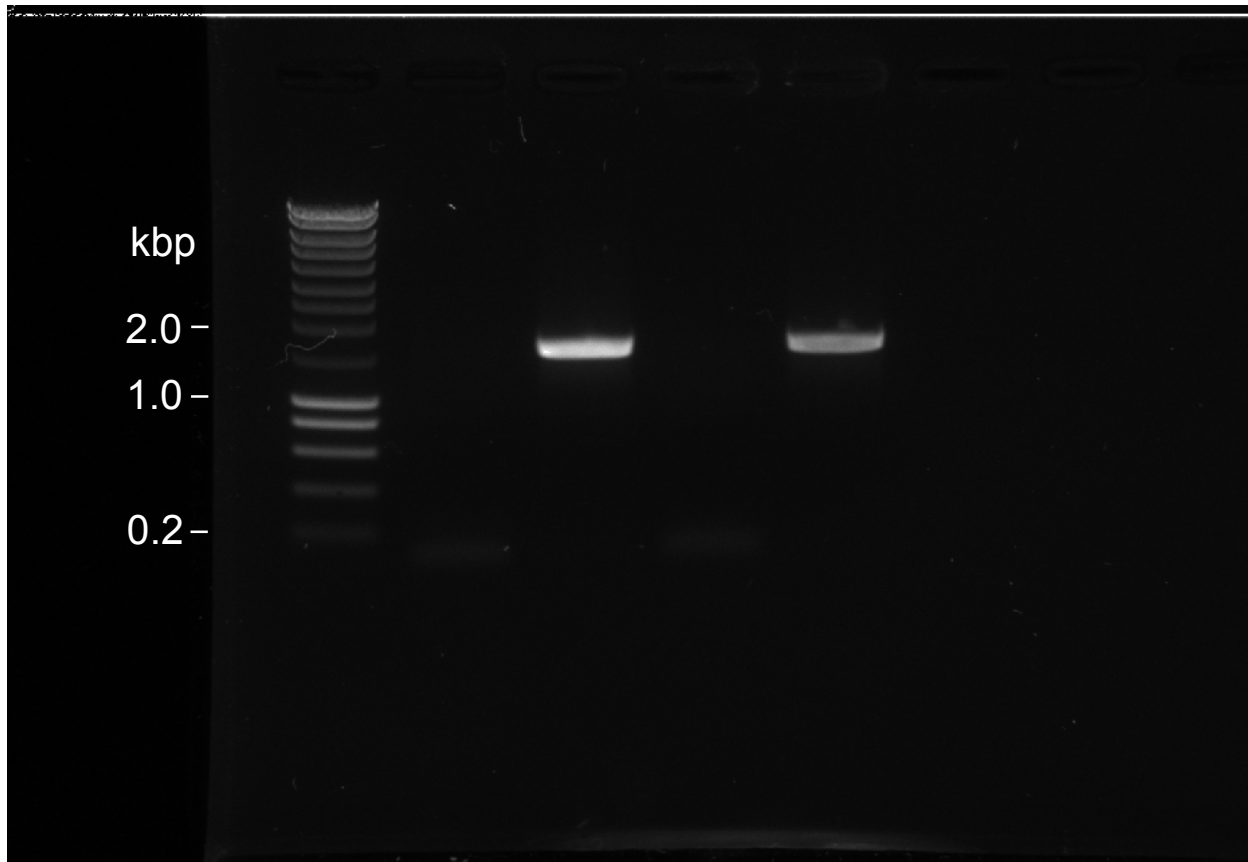

Supplement: supp [file elife-82207-supp-v1.zip]

## DGTS (32:0) standard

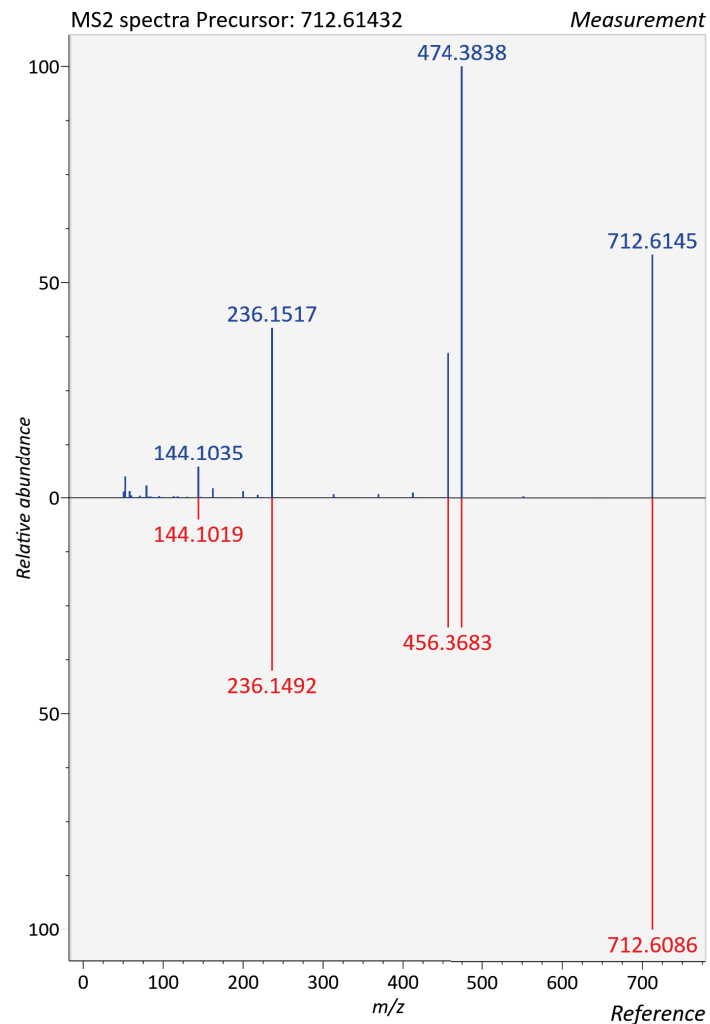

## DGTS (35:1)

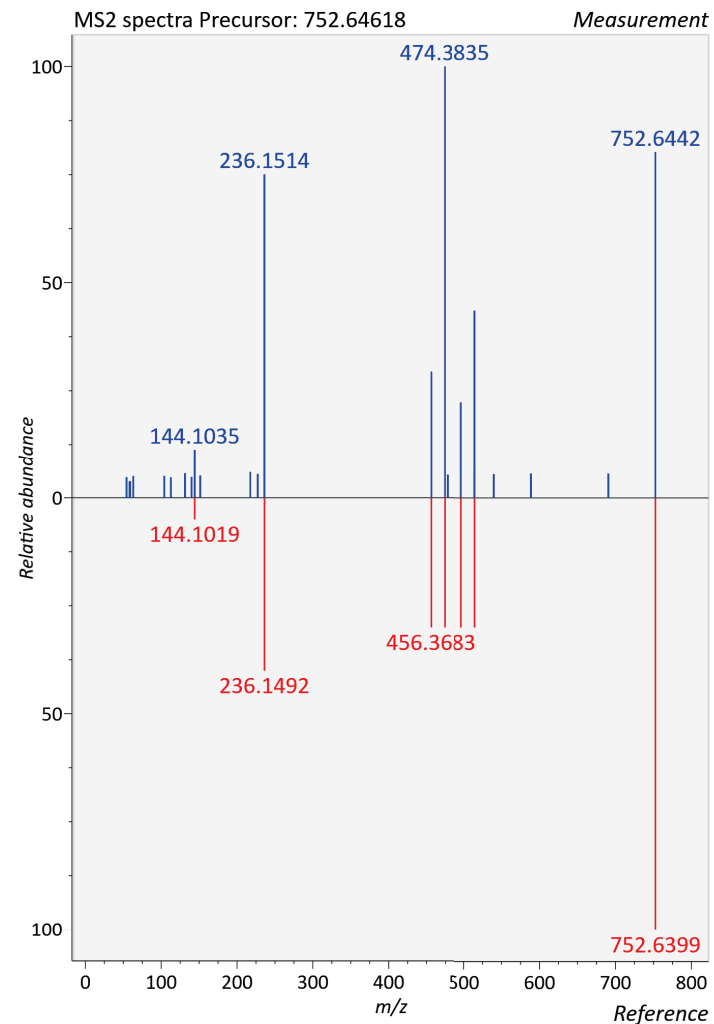

## DGTS (34:1)

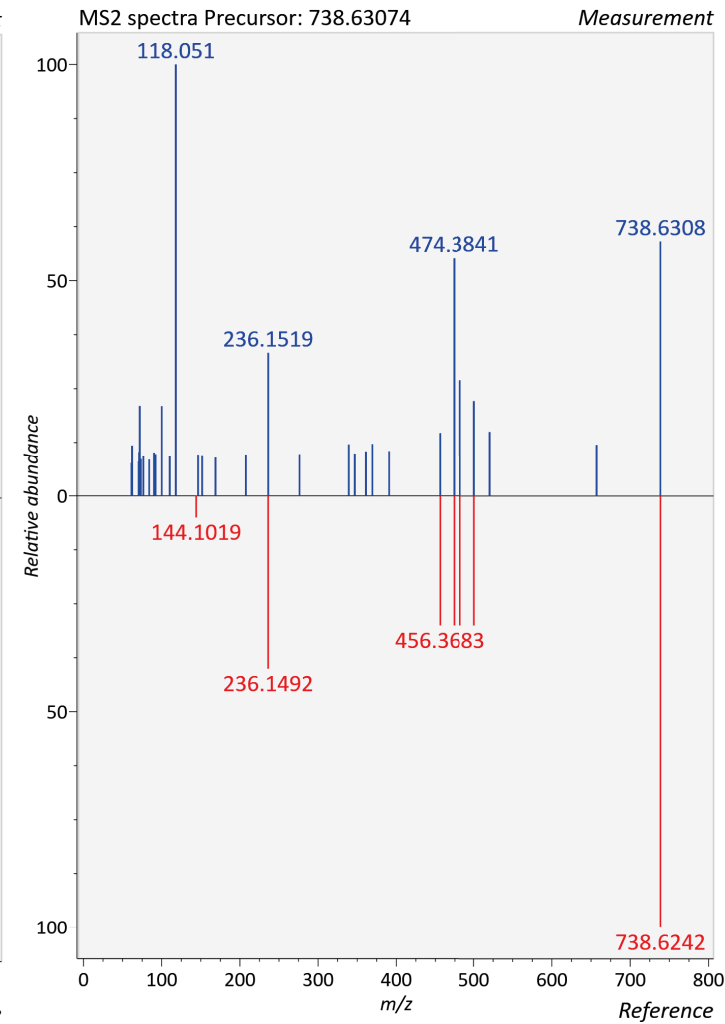

## DGTS (38:1)

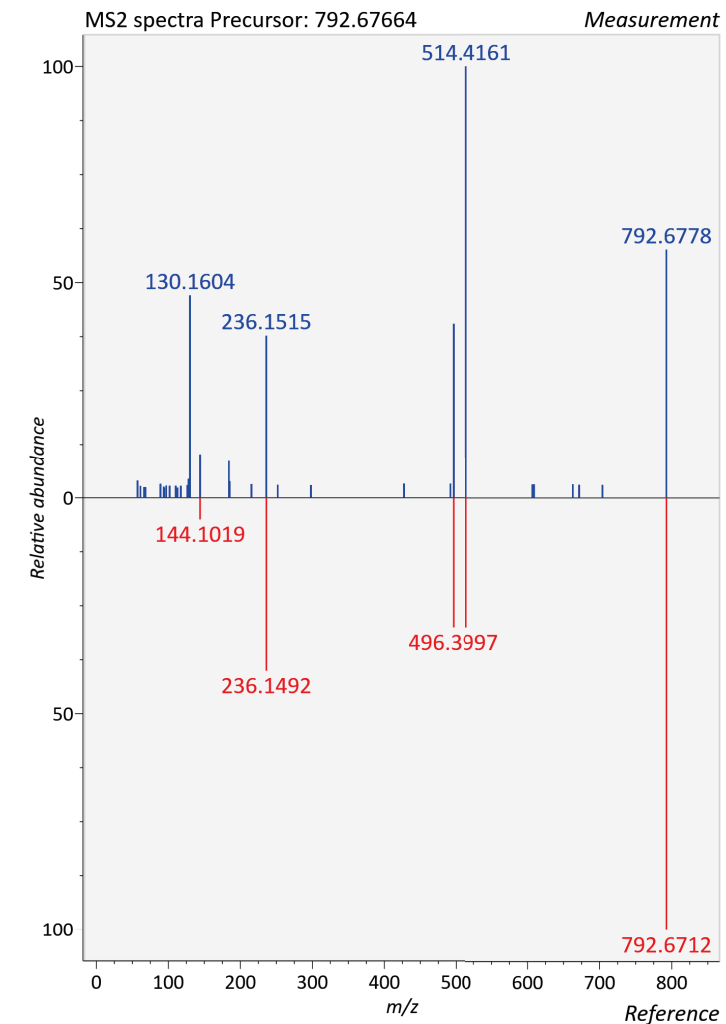

Supplement: supp [file elife-82207-supp-v1.zip]

**Figure S3B – Source data**

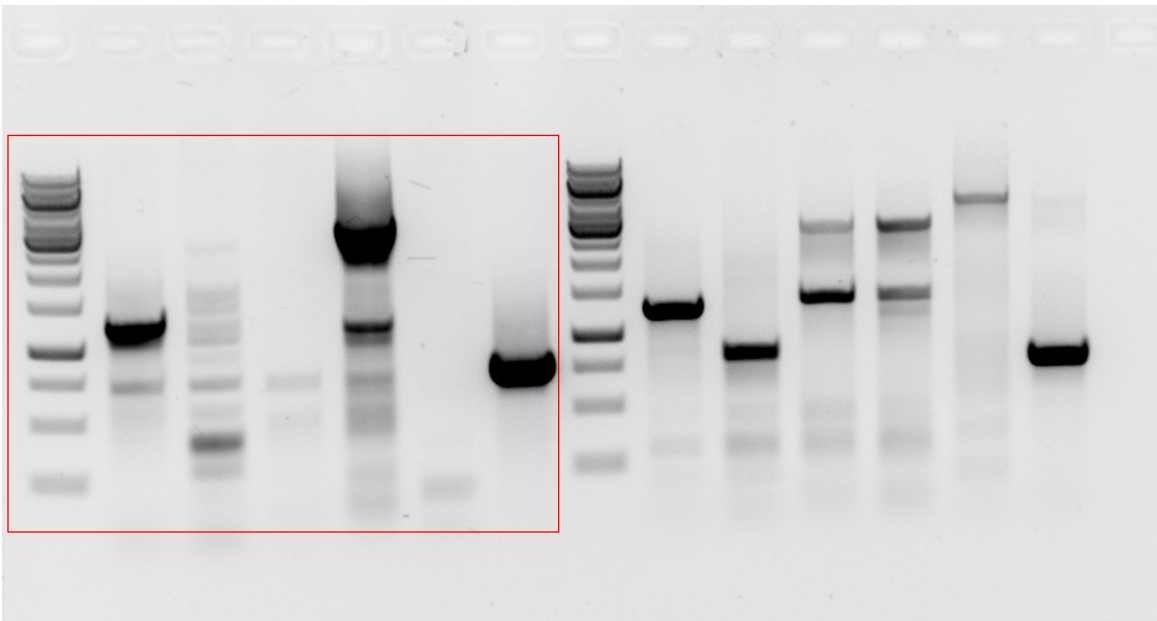

**Figure S3C – Source data**

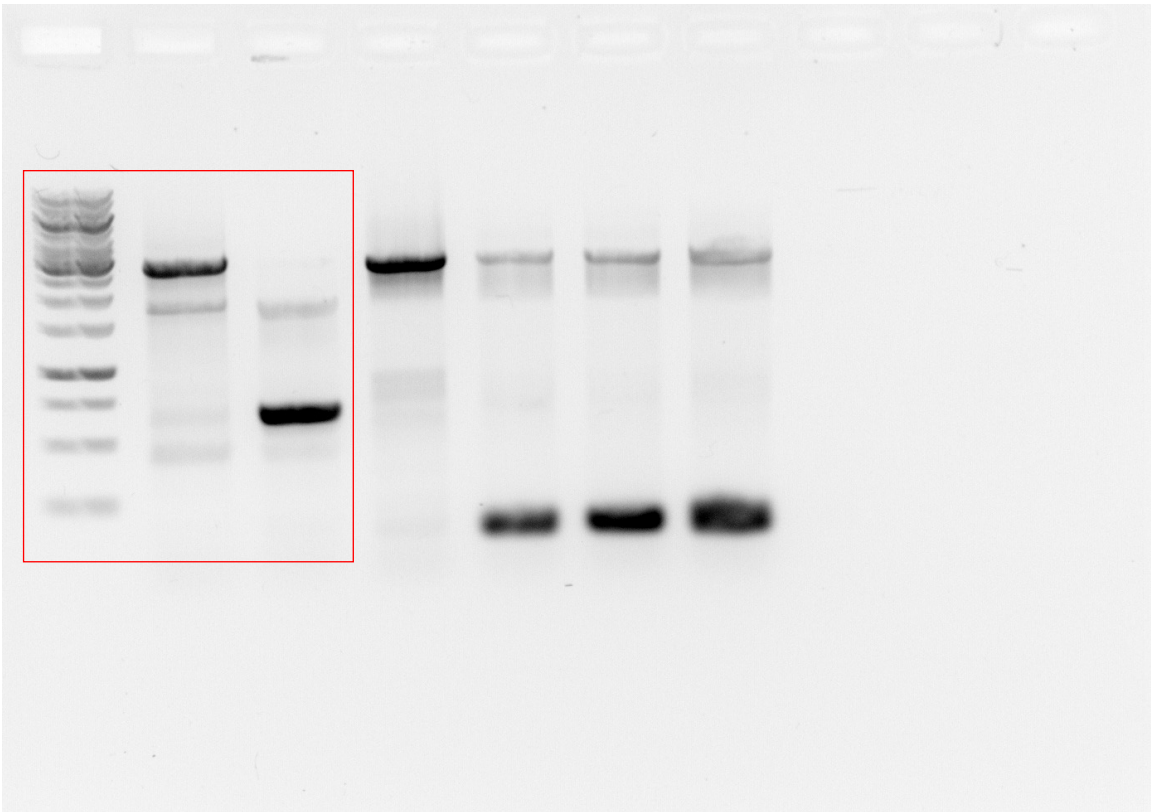

Figure S3D – Source data

anti-HA

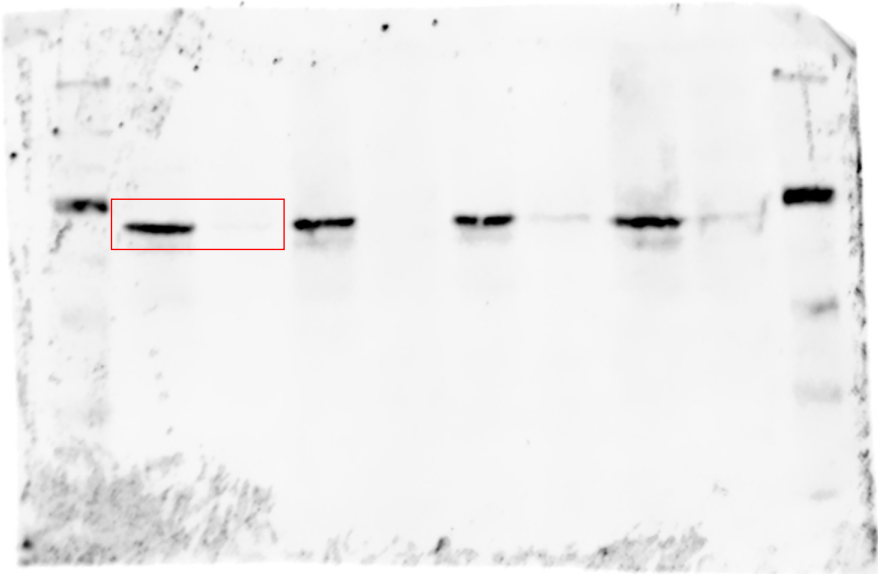

anti-Aldolase

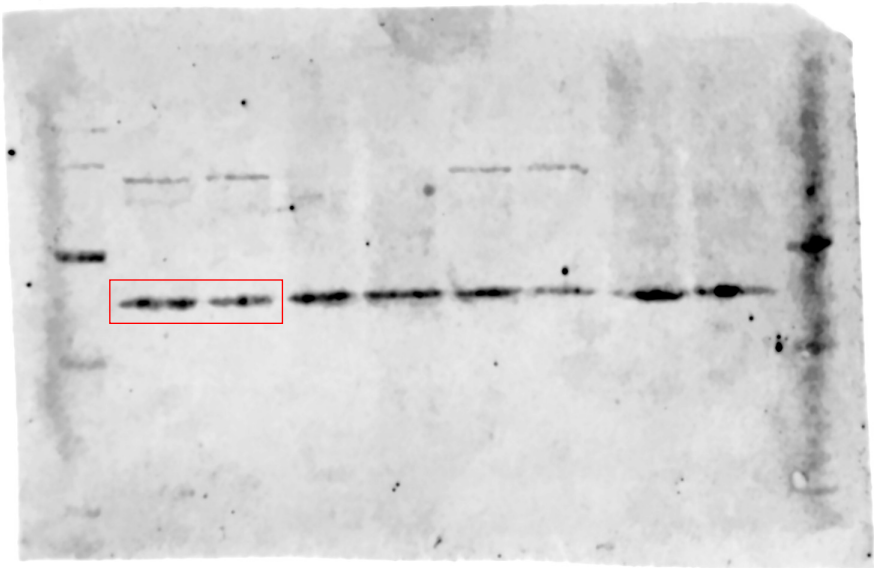

Supplement: supp [file elife-82207-supp-v1.zip]

- RAP

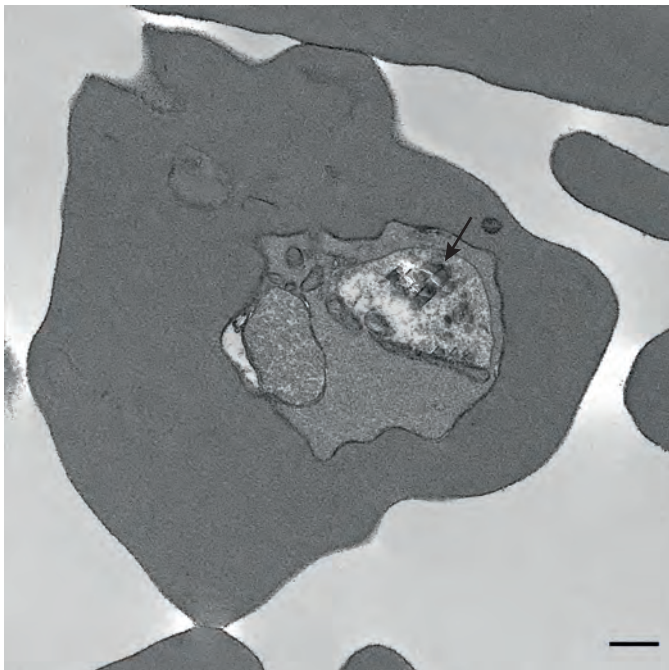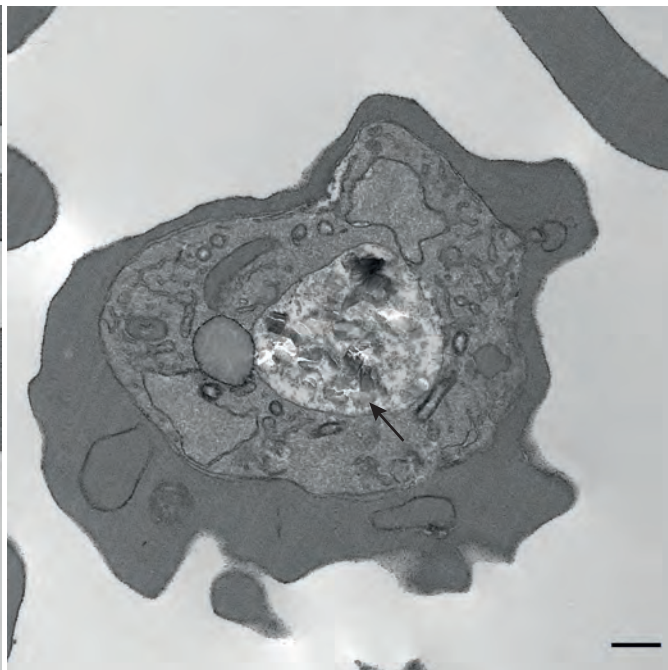

+ RAP

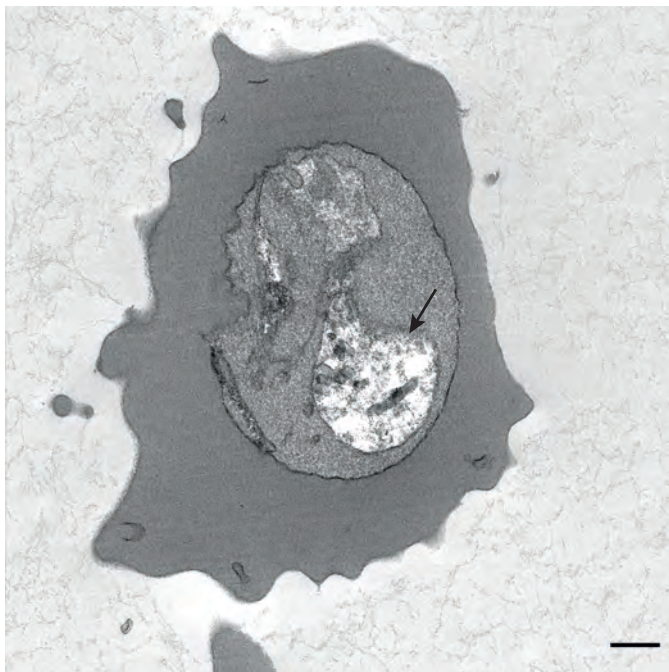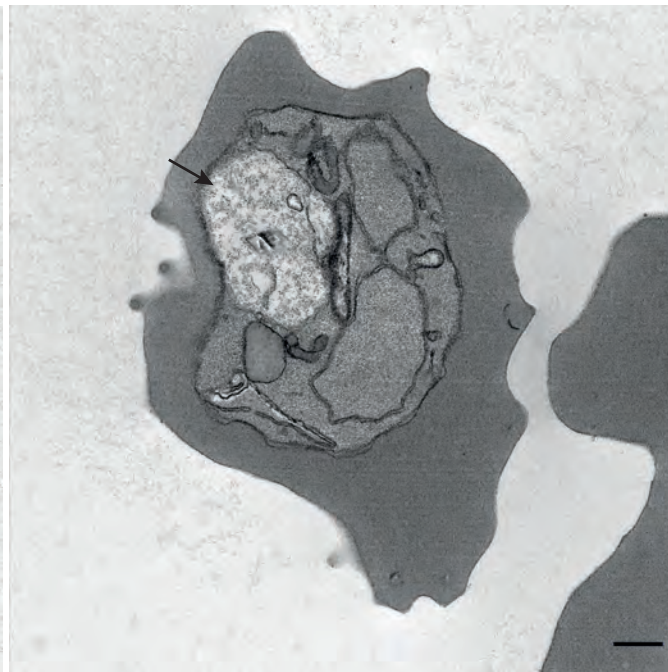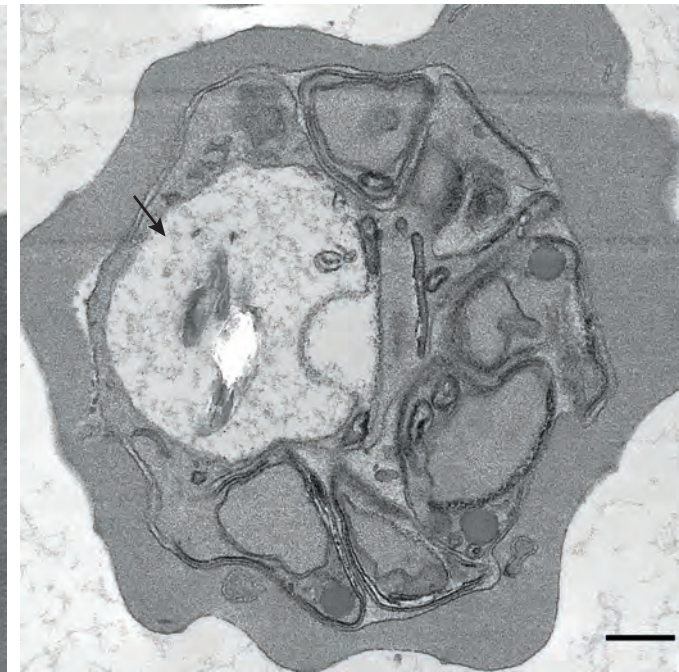

Supplement: supp [file elife-82207-supp-v1.zip]

B

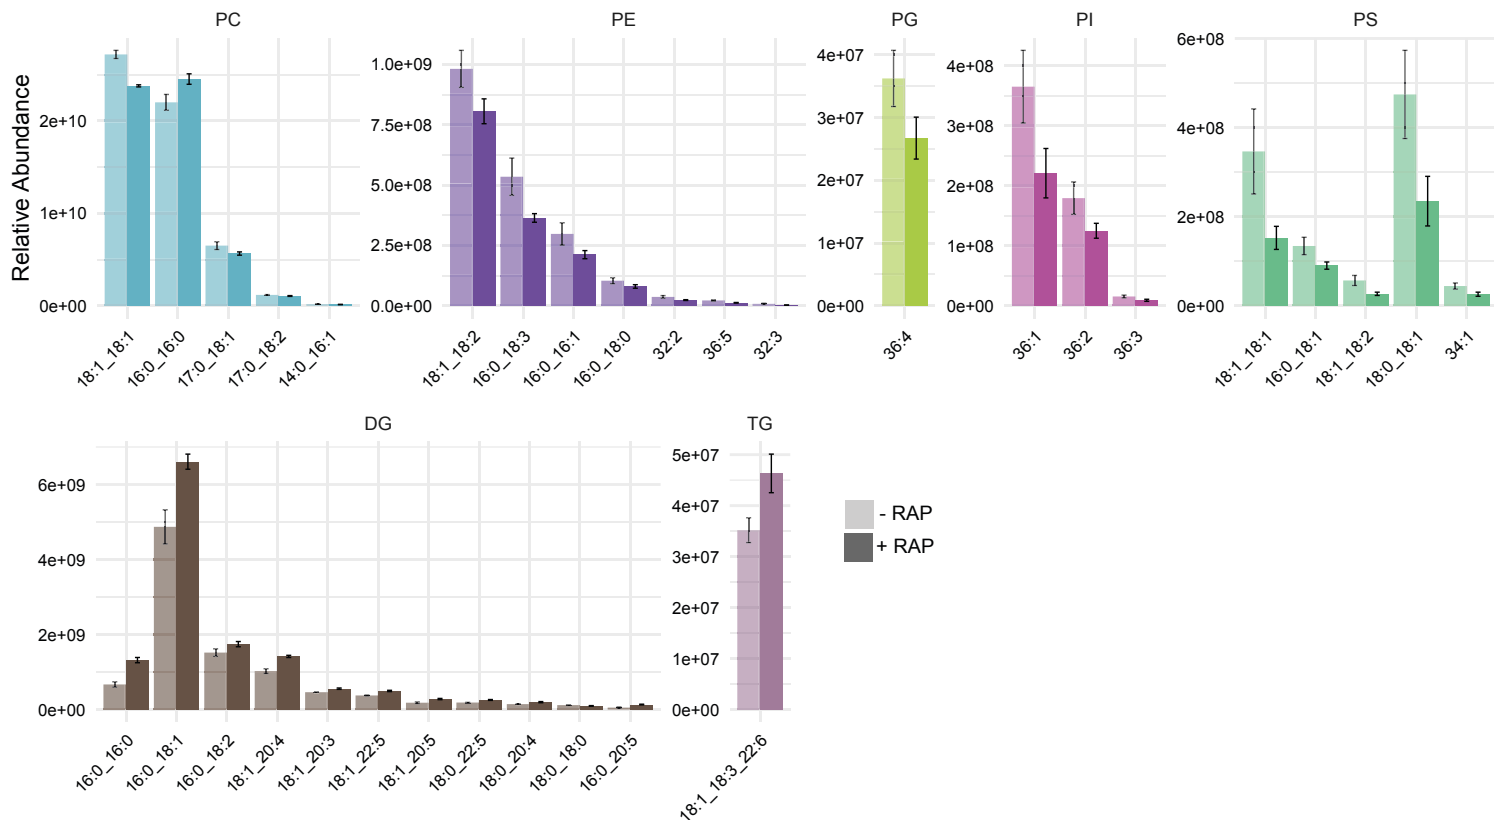

B

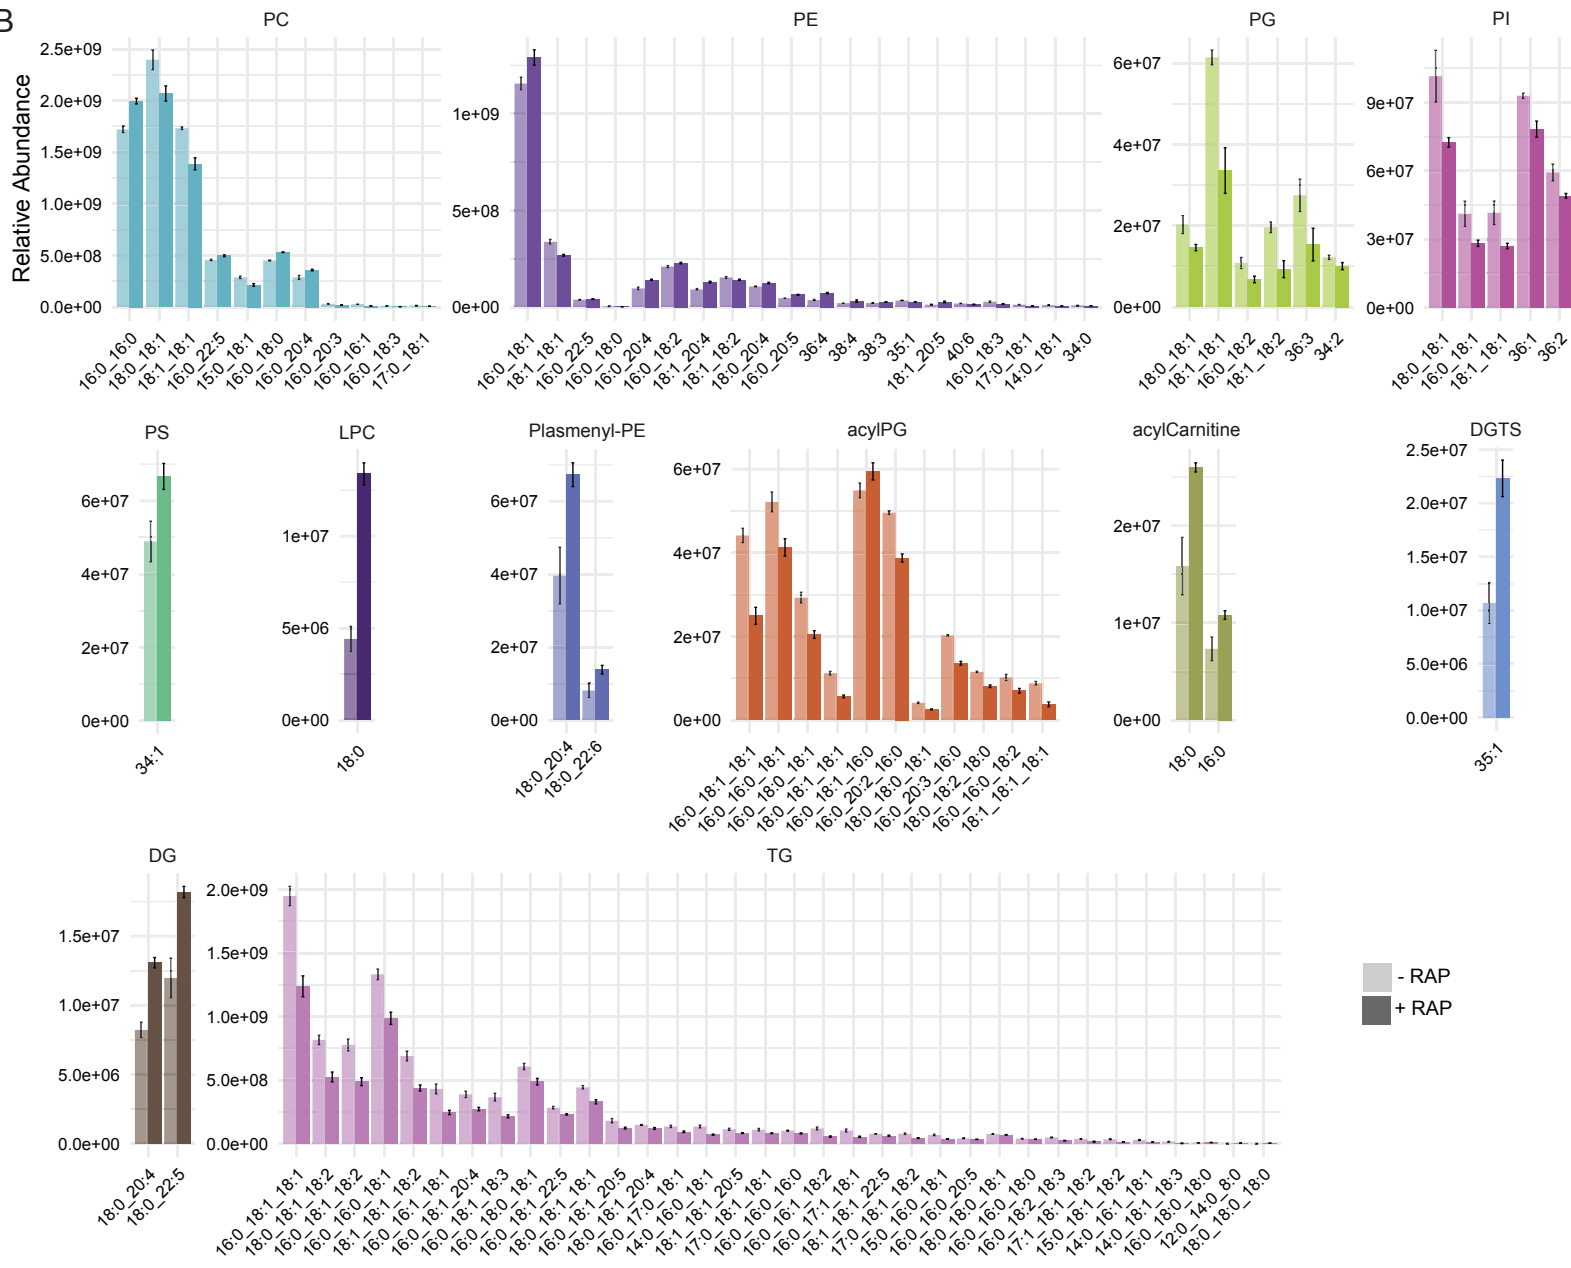

Supplement: supp [file elife-82207-supp-v1.zip]

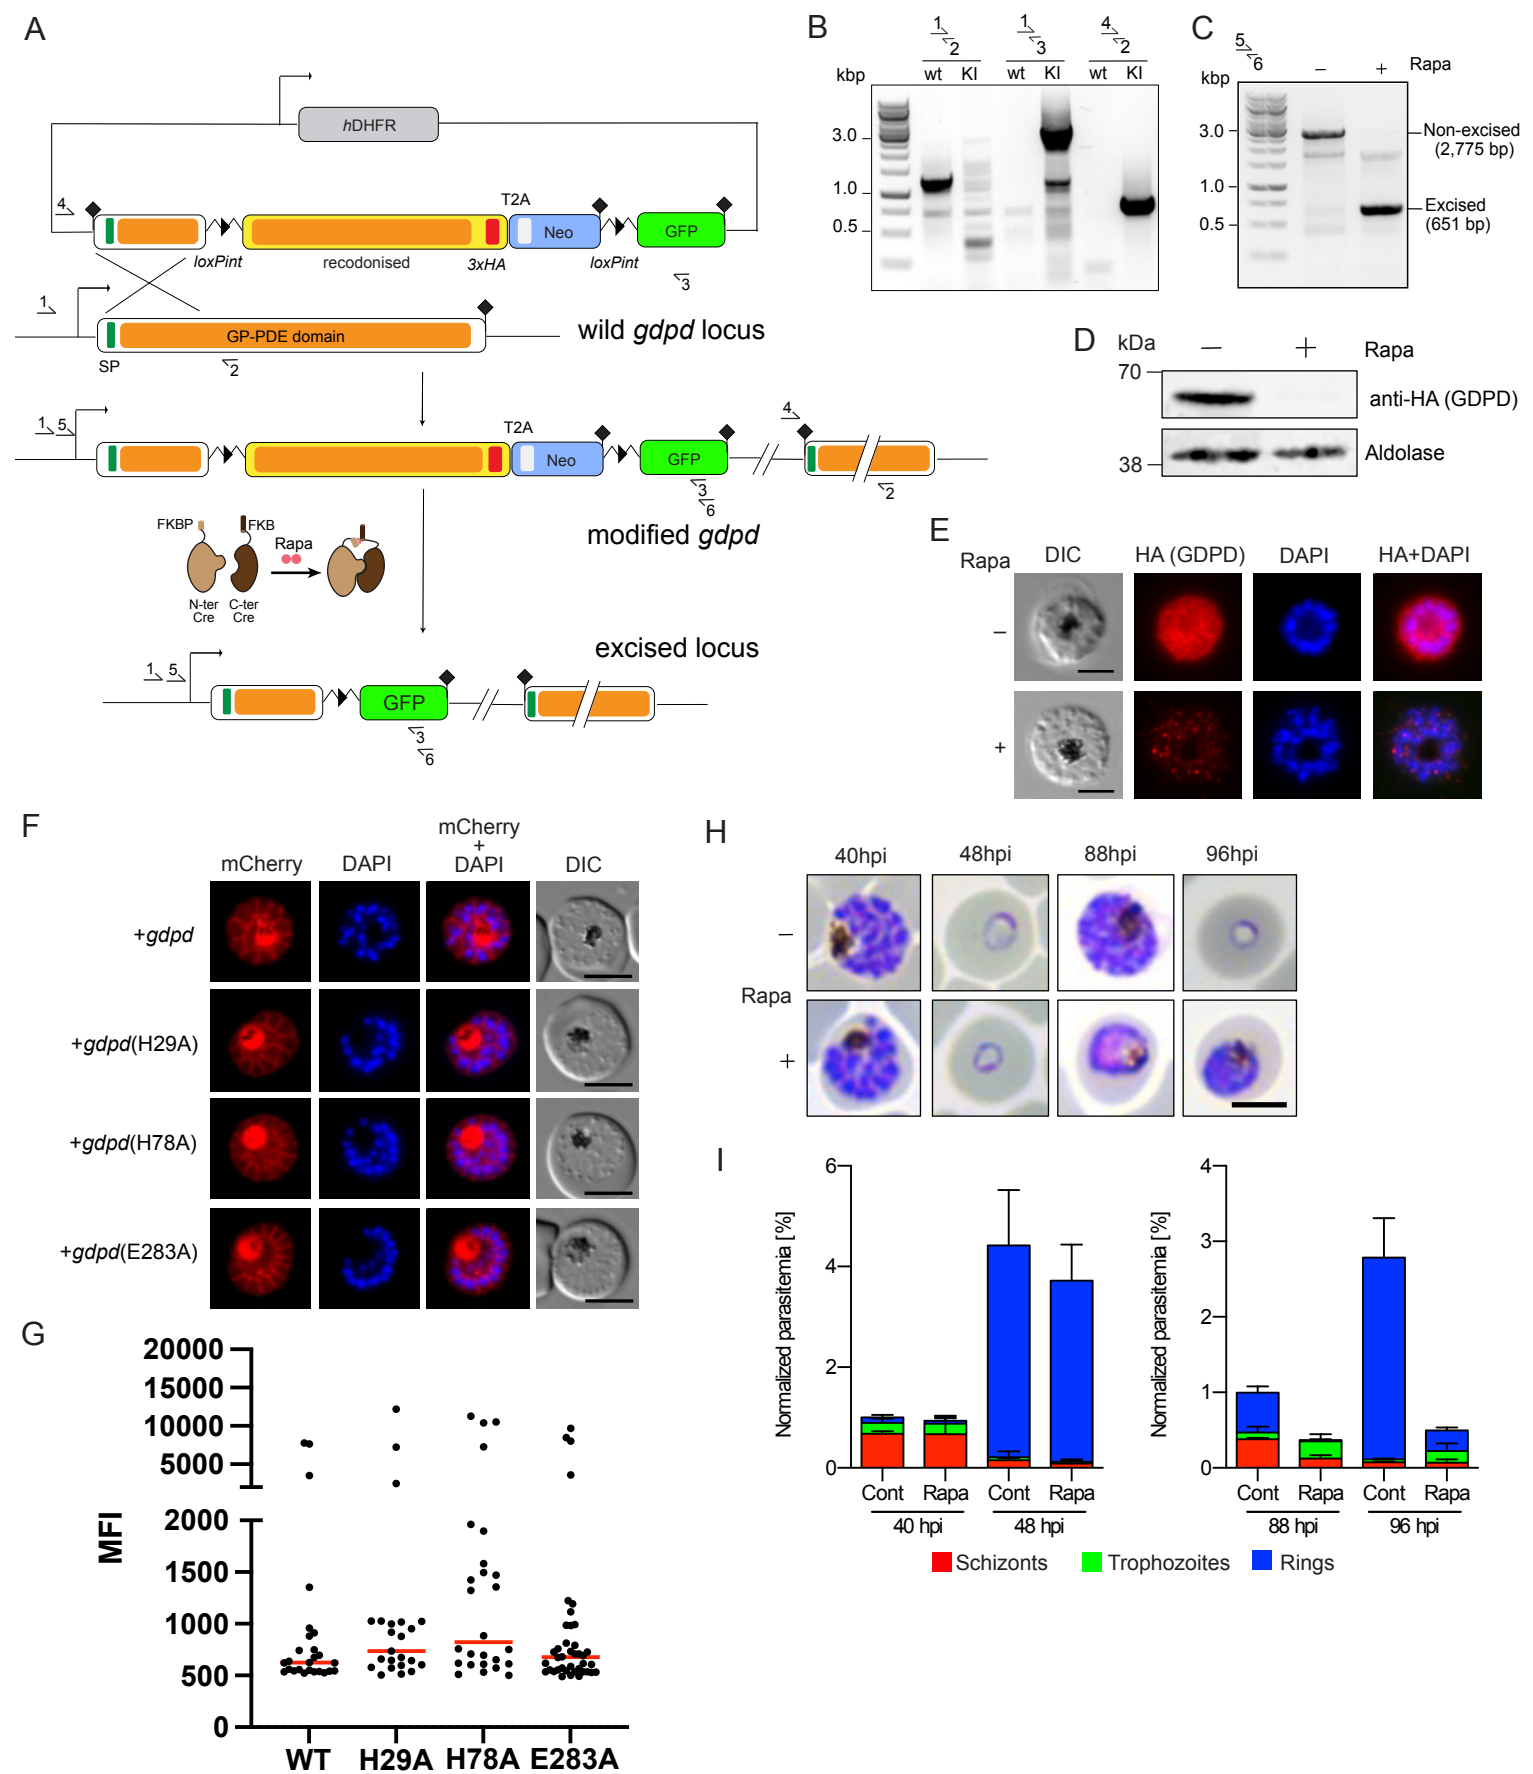

Supplement: supp [file elife-82207-supp-v1.zip]
